# Supplementary material
Source: publisher figshare collection journal article supplement (https://springernature.figshare.com/ndownloader/files/14199191)
Supplement: Supplementary file 1 [file 14199191]

## Sheet: Sheet1
LGA	monthnew	year
Brisbane	7	1997
Moreton Bay	8	1997
Moreton Bay	3	1997
Logan	10	1997
Logan	11	1997
Logan	9	1997
Logan	6	1997
Logan	9	1997
Logan	9	1997
Logan	1	1997
Logan	6	1997
Logan	11	1997
Logan	8	1997
Logan	4	1997
Logan	7	1997
Logan	4	1997
Brisbane	8	1997
Brisbane	9	1997
Brisbane	9	1997
Logan	8	1997
Logan	12	1997
Logan	10	1997
Logan	10	1997
Logan	1	1997
Logan	12	1997
Logan	8	1997
Logan	8	1997
Logan	10	1997
Logan	9	1997
Logan	4	1997
Logan	9	1997
Logan	8	1997
Logan	8	1997
Logan	11	1997
Logan	8	1997
Logan	11	1997
Logan	2	1997
Logan	1	1997
Logan	10	1997
Logan	9	1997
Logan	12	1997
Logan	9	1997
Logan	9	1997
Logan	1	1997
Logan	9	1997
Logan	5	1997
Logan	7	1997
Logan	6	1997
Logan	8	1997
Logan	8	1997
Logan	8	1997
Logan	5	1997
Logan	4	1997
Logan	1	1997
Logan	10	1997
Logan	10	1997
Logan	9	1997
Logan	3	1997
Logan	11	1997
Logan	11	1997
Moreton Bay	3	1997
Moreton Bay	7	1997
Moreton Bay	1	1997
Moreton Bay	1	1997
Moreton Bay	1	1997
Moreton Bay	1	1997
Brisbane	5	1997
Brisbane	9	1997
Moreton Bay	8	1997
Brisbane	8	1997
Brisbane	8	1997
Brisbane	9	1997
Brisbane	6	1997
Brisbane	12	1997
Brisbane	9	1997
Logan	9	1997
Logan	9	1997
Logan	6	1997
Logan	8	1997
Logan	8	1997
Brisbane	8	1997
Logan	11	1997
Logan	12	1997
Logan	8	1997
Logan	10	1997
Logan	2	1997
Logan	9	1997
Logan	2	1997
Logan	4	1997
Logan	2	1997
Logan	8	1997
Logan	3	1997
Logan	9	1997
Logan	9	1997
Logan	8	1997
Logan	9	1997
Logan	10	1997
Logan	11	1997
Logan	9	1997
Logan	9	1997
Logan	8	1997
Logan	8	1997
Logan	9	1997
Logan	9	1997
Logan	9	1997
Logan	9	1997
Logan	8	1997
Logan	8	1997
Logan	11	1997
Logan	12	1997
Logan	11	1997
Logan	9	1997
Logan	5	1997
Logan	10	1997
Logan	12	1997
Logan	10	1997
Logan	4	1997
Logan	9	1997
Logan	11	1997
Logan	8	1997
Logan	9	1997
Logan	11	1997
Logan	11	1997
Logan	12	1997
Logan	2	1997
Logan	11	1997
Logan	5	1997
Logan	2	1997
Logan	6	1997
Logan	10	1997
Logan	12	1997
Logan	8	1997
Logan	10	1997
Logan	7	1997
Logan	8	1997
Logan	3	1997
Logan	8	1997
Logan	10	1997
Logan	9	1997
Logan	6	1997
Logan	8	1997
Logan	10	1997
Logan	10	1997
Logan	9	1997
Logan	10	1997
Logan	8	1997
Logan	10	1997
Logan	10	1997
Logan	8	1997
Logan	11	1997
Logan	11	1997
Logan	3	1997
Logan	10	1997
Logan	9	1997
Logan	7	1997
Logan	3	1997
Logan	10	1997
Logan	8	1997
Logan	8	1997
Logan	10	1997
Logan	2	1997
Logan	7	1997
Logan	8	1997
Logan	8	1997
Logan	8	1997
Logan	4	1997
Moreton Bay	7	1997
Moreton Bay	5	1997
Moreton Bay	12	1997
Moreton Bay	8	1997
Moreton Bay	11	1997
Moreton Bay	7	1997
Moreton Bay	11	1997
Moreton Bay	9	1997
Moreton Bay	7	1997
Moreton Bay	12	1997
Moreton Bay	7	1997
Moreton Bay	1	1997
Moreton Bay	6	1997
Moreton Bay	10	1997
Moreton Bay	9	1997
Moreton Bay	8	1997
Moreton Bay	8	1997
Moreton Bay	7	1997
Moreton Bay	7	1997
Moreton Bay	7	1997
Moreton Bay	8	1997
Moreton Bay	7	1997
Moreton Bay	9	1997
Moreton Bay	7	1997
Moreton Bay	9	1997
Moreton Bay	6	1997
Moreton Bay	6	1997
Moreton Bay	5	1997
Brisbane	7	1997
Brisbane	12	1997
Redland	12	1997
Brisbane	9	1997
Redland	4	1997
Moreton Bay	9	1997
Moreton Bay	8	1997
Moreton Bay	8	1997
Moreton Bay	8	1997
Moreton Bay	8	1997
Moreton Bay	12	1997
Moreton Bay	6	1997
Moreton Bay	6	1997
Brisbane	11	1997
Brisbane	9	1997
Brisbane	8	1997
Redland	8	1997
Redland	11	1997
Redland	5	1997
Redland	1	1997
Redland	6	1997
Redland	1	1997
Redland	7	1997
Redland	11	1997
Redland	3	1997
Redland	11	1997
Redland	8	1997
Redland	8	1997
Redland	10	1997
Redland	9	1997
Redland	8	1997
Redland	8	1997
Redland	6	1997
Redland	8	1997
Redland	10	1997
Redland	2	1997
Brisbane	7	1997
Redland	2	1997
Redland	7	1997
Redland	3	1997
Redland	8	1997
Redland	8	1997
Redland	12	1997
Redland	7	1997
Redland	11	1997
Redland	5	1997
Redland	10	1997
Redland	7	1997
Redland	1	1997
Redland	7	1997
Logan	2	1997
Logan	8	1997
Redland	6	1997
Redland	7	1997
Redland	5	1997
Redland	1	1997
Redland	7	1997
Redland	2	1997
Logan	9	1997
Moreton Bay	8	1997
Moreton Bay	6	1997
Moreton Bay	3	1997
Moreton Bay	7	1997
Moreton Bay	9	1997
Redland	7	1997
Redland	8	1997
Redland	3	1997
Redland	8	1997
Redland	11	1997
Redland	7	1997
Redland	9	1997
Redland	11	1997
Redland	4	1997
Redland	1	1997
Redland	2	1997
Redland	10	1997
Redland	6	1997
Redland	6	1997
Redland	9	1997
Redland	7	1997
Redland	8	1997
Redland	3	1997
Redland	10	1997
Redland	12	1997
Redland	8	1997
Brisbane	11	1997
Brisbane	12	1997
Brisbane	10	1997
Brisbane	9	1997
Brisbane	11	1997
Brisbane	2	1997
Brisbane	10	1997
Brisbane	9	1997
Brisbane	2	1997
Redland	7	1997
Redland	11	1997
Redland	5	1997
Redland	1	1997
Redland	9	1997
Redland	9	1997
Redland	9	1997
Redland	4	1997
Brisbane	8	1997
Redland	7	1997
Redland	8	1997
Redland	10	1997
Redland	7	1997
Redland	8	1997
Redland	4	1997
Redland	8	1997
Redland	10	1997
Redland	3	1997
Redland	2	1997
Redland	8	1997
Redland	3	1997
Brisbane	9	1997
Redland	7	1997
Redland	8	1997
Redland	10	1997
Redland	12	1997
Redland	8	1997
Redland	3	1997
Redland	11	1997
Redland	7	1997
Redland	5	1997
Redland	9	1997
Redland	9	1997
Redland	9	1997
Redland	1	1997
Redland	9	1997
Redland	5	1997
Redland	10	1997
Redland	10	1997
Redland	8	1997
Redland	9	1997
Redland	9	1997
Redland	11	1997
Redland	10	1997
Redland	6	1997
Redland	10	1997
Redland	8	1997
Redland	3	1997
Redland	10	1997
Redland	9	1997
Redland	3	1997
Redland	8	1997
Redland	9	1997
Redland	5	1997
Redland	2	1997
Redland	9	1997
Redland	8	1997
Redland	11	1997
Redland	7	1997
Redland	11	1997
Redland	10	1997
Redland	9	1997
Redland	9	1997
Redland	7	1997
Redland	10	1997
Redland	4	1997
Redland	6	1997
Redland	9	1997
Redland	3	1997
Redland	3	1997
Redland	11	1997
Redland	2	1997
Redland	12	1997
Redland	6	1997
Redland	2	1997
Redland	8	1997
Redland	8	1997
Redland	10	1997
Redland	6	1997
Redland	5	1997
Redland	5	1997
Redland	7	1997
Redland	8	1997
Redland	1	1997
Redland	6	1997
Redland	8	1997
Redland	8	1997
Redland	9	1997
Redland	7	1997
Redland	1	1997
Redland	10	1997
Redland	7	1997
Redland	5	1997
Redland	7	1997
Redland	5	1997
Redland	12	1997
Redland	11	1997
Redland	7	1997
Redland	4	1997
Redland	12	1997
Redland	8	1997
Redland	10	1997
Redland	5	1997
Redland	2	1997
Redland	6	1997
Redland	8	1997
Redland	2	1997
Redland	2	1997
Redland	8	1997
Redland	5	1997
Redland	5	1997
Redland	8	1997
Redland	8	1997
Redland	3	1997
Redland	4	1997
Redland	9	1997
Redland	9	1997
Redland	6	1997
Redland	8	1997
Redland	8	1997
Redland	10	1997
Redland	7	1997
Redland	4	1997
Redland	2	1997
Redland	1	1997
Redland	6	1997
Redland	2	1997
Redland	9	1997
Redland	8	1997
Redland	4	1997
Redland	1	1997
Redland	5	1997
Redland	10	1997
Redland	1	1997
Redland	5	1997
Redland	4	1997
Redland	4	1997
Redland	4	1997
Redland	4	1997
Redland	2	1997
Redland	9	1997
Redland	7	1997
Redland	9	1997
Redland	7	1997
Redland	10	1997
Redland	8	1997
Redland	9	1997
Redland	8	1997
Redland	7	1997
Redland	9	1997
Redland	2	1997
Redland	9	1997
Redland	4	1997
Redland	7	1997
Redland	6	1997
Redland	10	1997
Redland	8	1997
Redland	9	1997
Redland	3	1997
Redland	9	1997
Redland	10	1997
Redland	8	1997
Redland	8	1997
Redland	1	1997
Redland	8	1997
Redland	9	1997
Redland	8	1997
Redland	8	1997
Redland	10	1997
Somerset	10	1997
Moreton Bay	9	1997
Ipswich	10	1997
Brisbane	9	1997
Somerset	8	1997
Somerset	12	1997
Redland	10	1997
Redland	5	1997
Brisbane	9	1997
Brisbane	2	1997
Ipswich	10	1997
Ipswich	8	1997
Ipswich	8	1997
Ipswich	10	1997
Ipswich	12	1997
Ipswich	12	1997
Scenic Rim	10	1997
Logan	11	1997
Scenic Rim	4	1997
Brisbane	10	1997
Ipswich	10	1997
Ipswich	7	1997
Ipswich	2	1997
Logan	1	1997
Brisbane	9	1997
Brisbane	7	1997
Brisbane	7	1997
Brisbane	7	1997
Redland	9	1997
Brisbane	6	1997
Ipswich	10	1997
Ipswich	3	1997
Ipswich	3	1997
Ipswich	4	1997
Redland	12	1997
Ipswich	10	1997
Ipswich	9	1997
Ipswich	12	1997
Ipswich	11	1997
Ipswich	10	1997
Ipswich	10	1997
Ipswich	10	1997
Ipswich	1	1997
Ipswich	10	1997
Ipswich	10	1997
Ipswich	10	1997
Ipswich	9	1997
Ipswich	10	1997
Ipswich	10	1997
Ipswich	9	1997
Ipswich	10	1997
Ipswich	10	1997
Ipswich	8	1997
Ipswich	7	1997
Ipswich	10	1997
Ipswich	11	1997
Ipswich	9	1997
Ipswich	8	1997
Logan	12	1997
Logan	12	1997
Logan	9	1997
Logan	2	1997
Logan	9	1997
Logan	6	1997
Logan	2	1997
Logan	5	1997
Logan	9	1997
Logan	2	1997
Logan	2	1997
Logan	10	1997
Moreton Bay	1	1998
Logan	8	1998
Logan	8	1998
Logan	10	1998
Logan	9	1998
Logan	6	1998
Logan	8	1998
Logan	8	1998
Logan	8	1998
Logan	2	1998
Logan	10	1998
Logan	1	1998
Logan	10	1998
Logan	10	1998
Logan	10	1998
Logan	1	1998
Logan	11	1998
Logan	8	1998
Logan	8	1998
Logan	8	1998
Logan	12	1998
Logan	9	1998
Logan	6	1998
Logan	11	1998
Logan	10	1998
Logan	9	1998
Logan	9	1998
Logan	10	1998
Logan	7	1998
Logan	10	1998
Logan	6	1998
Logan	2	1998
Logan	6	1998
Logan	11	1998
Logan	1	1998
Logan	10	1998
Logan	8	1998
Logan	8	1998
Logan	10	1998
Logan	10	1998
Logan	5	1998
Logan	10	1998
Logan	2	1998
Moreton Bay	9	1998
Moreton Bay	9	1998
Moreton Bay	5	1998
Moreton Bay	10	1998
Moreton Bay	6	1998
Moreton Bay	6	1998
Moreton Bay	4	1998
Moreton Bay	4	1998
Moreton Bay	10	1998
Moreton Bay	2	1998
Moreton Bay	2	1998
Moreton Bay	5	1998
Brisbane	7	1998
Moreton Bay	1	1998
Moreton Bay	7	1998
Moreton Bay	10	1998
Moreton Bay	9	1998
Moreton Bay	5	1998
Moreton Bay	8	1998
Brisbane	8	1998
Brisbane	7	1998
Brisbane	7	1998
Brisbane	1	1998
Brisbane	6	1998
Brisbane	6	1998
Brisbane	10	1998
Brisbane	8	1998
Brisbane	8	1998
Brisbane	9	1998
Brisbane	4	1998
Brisbane	2	1998
Brisbane	10	1998
Logan	10	1998
Logan	11	1998
Logan	7	1998
Logan	12	1998
Logan	8	1998
Logan	1	1998
Logan	1	1998
Logan	4	1998
Logan	10	1998
Logan	10	1998
Logan	10	1998
Logan	8	1998
Logan	9	1998
Logan	3	1998
Logan	1	1998
Logan	10	1998
Logan	10	1998
Logan	10	1998
Logan	10	1998
Logan	1	1998
Logan	8	1998
Logan	8	1998
Logan	8	1998
Logan	8	1998
Logan	1	1998
Brisbane	10	1998
Logan	9	1998
Logan	2	1998
Logan	9	1998
Logan	9	1998
Logan	12	1998
Logan	7	1998
Logan	8	1998
Logan	7	1998
Logan	7	1998
Logan	1	1998
Logan	1	1998
Logan	7	1998
Logan	9	1998
Logan	9	1998
Logan	6	1998
Logan	5	1998
Logan	3	1998
Logan	9	1998
Logan	3	1998
Logan	2	1998
Logan	9	1998
Logan	10	1998
Logan	1	1998
Logan	1	1998
Logan	2	1998
Logan	10	1998
Logan	2	1998
Logan	2	1998
Logan	6	1998
Logan	9	1998
Logan	9	1998
Logan	10	1998
Logan	12	1998
Logan	2	1998
Logan	5	1998
Logan	5	1998
Logan	5	1998
Logan	3	1998
Logan	7	1998
Logan	8	1998
Logan	10	1998
Logan	4	1998
Logan	9	1998
Logan	8	1998
Logan	11	1998
Logan	7	1998
Logan	6	1998
Logan	9	1998
Logan	5	1998
Logan	7	1998
Logan	10	1998
Logan	10	1998
Logan	8	1998
Logan	10	1998
Logan	5	1998
Logan	5	1998
Logan	4	1998
Logan	11	1998
Logan	1	1998
Logan	2	1998
Logan	7	1998
Logan	3	1998
Logan	10	1998
Logan	10	1998
Logan	8	1998
Logan	8	1998
Logan	8	1998
Logan	8	1998
Logan	10	1998
Logan	11	1998
Logan	1	1998
Logan	1	1998
Logan	2	1998
Logan	9	1998
Logan	10	1998
Logan	3	1998
Logan	11	1998
Logan	10	1998
Logan	7	1998
Logan	7	1998
Logan	1	1998
Logan	2	1998
Logan	1	1998
Logan	3	1998
Logan	6	1998
Logan	9	1998
Logan	4	1998
Logan	2	1998
Logan	9	1998
Logan	10	1998
Logan	6	1998
Logan	2	1998
Logan	7	1998
Logan	9	1998
Moreton Bay	6	1998
Moreton Bay	8	1998
Moreton Bay	4	1998
Moreton Bay	8	1998
Moreton Bay	8	1998
Moreton Bay	8	1998
Moreton Bay	7	1998
Moreton Bay	2	1998
Moreton Bay	8	1998
Moreton Bay	8	1998
Moreton Bay	3	1998
Moreton Bay	10	1998
Moreton Bay	8	1998
Moreton Bay	8	1998
Moreton Bay	8	1998
Moreton Bay	6	1998
Moreton Bay	7	1998
Moreton Bay	10	1998
Moreton Bay	9	1998
Moreton Bay	3	1998
Moreton Bay	9	1998
Moreton Bay	7	1998
Moreton Bay	10	1998
Moreton Bay	10	1998
Moreton Bay	10	1998
Moreton Bay	8	1998
Moreton Bay	12	1998
Moreton Bay	7	1998
Moreton Bay	10	1998
Moreton Bay	10	1998
Moreton Bay	1	1998
Moreton Bay	5	1998
Moreton Bay	7	1998
Moreton Bay	9	1998
Moreton Bay	8	1998
Moreton Bay	9	1998
Moreton Bay	8	1998
Moreton Bay	7	1998
Moreton Bay	9	1998
Moreton Bay	3	1998
Moreton Bay	3	1998
Moreton Bay	6	1998
Moreton Bay	7	1998
Moreton Bay	8	1998
Moreton Bay	10	1998
Moreton Bay	10	1998
Moreton Bay	4	1998
Moreton Bay	3	1998
Moreton Bay	9	1998
Moreton Bay	8	1998
Moreton Bay	8	1998
Moreton Bay	6	1998
Moreton Bay	9	1998
Moreton Bay	7	1998
Moreton Bay	7	1998
Moreton Bay	9	1998
Moreton Bay	3	1998
Moreton Bay	8	1998
Moreton Bay	3	1998
Moreton Bay	9	1998
Moreton Bay	3	1998
Moreton Bay	5	1998
Moreton Bay	9	1998
Moreton Bay	5	1998
Moreton Bay	9	1998
Moreton Bay	2	1998
Moreton Bay	8	1998
Moreton Bay	10	1998
Brisbane	11	1998
Moreton Bay	8	1998
Redland	7	1998
Redland	2	1998
Redland	8	1998
Moreton Bay	6	1998
Moreton Bay	9	1998
Moreton Bay	9	1998
Moreton Bay	8	1998
Redland	6	1998
Moreton Bay	9	1998
Moreton Bay	5	1998
Moreton Bay	3	1998
Moreton Bay	12	1998
Moreton Bay	10	1998
Moreton Bay	12	1998
Moreton Bay	3	1998
Moreton Bay	7	1998
Moreton Bay	8	1998
Brisbane	10	1998
Brisbane	2	1998
Redland	8	1998
Redland	10	1998
Redland	2	1998
Redland	8	1998
Redland	9	1998
Redland	11	1998
Redland	1	1998
Redland	6	1998
Redland	9	1998
Redland	10	1998
Redland	10	1998
Redland	9	1998
Redland	9	1998
Redland	8	1998
Redland	3	1998
Redland	4	1998
Redland	11	1998
Redland	6	1998
Redland	5	1998
Redland	8	1998
Redland	10	1998
Redland	9	1998
Redland	7	1998
Redland	8	1998
Redland	9	1998
Redland	1	1998
Redland	6	1998
Redland	9	1998
Redland	6	1998
Brisbane	11	1998
Redland	1	1998
Logan	10	1998
Logan	10	1998
Logan	10	1998
Logan	10	1998
Logan	10	1998
Redland	3	1998
Redland	5	1998
Redland	2	1998
Redland	7	1998
Redland	6	1998
Redland	2	1998
Moreton Bay	11	1998
Moreton Bay	10	1998
Moreton Bay	8	1998
Moreton Bay	7	1998
Moreton Bay	12	1998
Moreton Bay	9	1998
Moreton Bay	2	1998
Moreton Bay	10	1998
Redland	9	1998
Redland	5	1998
Redland	9	1998
Redland	3	1998
Redland	11	1998
Redland	8	1998
Redland	10	1998
Redland	9	1998
Redland	10	1998
Redland	5	1998
Redland	5	1998
Redland	11	1998
Redland	9	1998
Redland	4	1998
Redland	5	1998
Redland	12	1998
Redland	8	1998
Redland	8	1998
Redland	10	1998
Redland	2	1998
Brisbane	9	1998
Brisbane	5	1998
Redland	12	1998
Redland	3	1998
Redland	10	1998
Redland	10	1998
Redland	10	1998
Redland	9	1998
Redland	2	1998
Redland	1	1998
Redland	1	1998
Redland	2	1998
Redland	1	1998
Redland	12	1998
Redland	6	1998
Brisbane	9	1998
Brisbane	10	1998
Brisbane	10	1998
Brisbane	10	1998
Brisbane	1	1998
Brisbane	10	1998
Brisbane	8	1998
Brisbane	9	1998
Brisbane	9	1998
Redland	6	1998
Redland	8	1998
Redland	2	1998
Redland	4	1998
Redland	10	1998
Redland	2	1998
Redland	12	1998
Redland	11	1998
Redland	1	1998
Redland	9	1998
Redland	10	1998
Redland	8	1998
Redland	8	1998
Redland	8	1998
Redland	10	1998
Redland	10	1998
Redland	9	1998
Redland	9	1998
Redland	6	1998
Redland	6	1998
Redland	2	1998
Redland	7	1998
Redland	10	1998
Redland	8	1998
Redland	6	1998
Redland	1	1998
Redland	1	1998
Redland	2	1998
Redland	7	1998
Redland	2	1998
Redland	9	1998
Redland	9	1998
Redland	9	1998
Redland	11	1998
Redland	1	1998
Redland	9	1998
Redland	3	1998
Redland	8	1998
Redland	7	1998
Redland	2	1998
Redland	5	1998
Redland	8	1998
Brisbane	10	1998
Redland	2	1998
Redland	9	1998
Redland	10	1998
Redland	9	1998
Redland	7	1998
Redland	8	1998
Redland	10	1998
Redland	1	1998
Redland	7	1998
Redland	8	1998
Redland	1	1998
Redland	6	1998
Redland	11	1998
Redland	4	1998
Redland	7	1998
Redland	8	1998
Redland	9	1998
Redland	8	1998
Redland	2	1998
Redland	7	1998
Redland	9	1998
Redland	7	1998
Redland	7	1998
Redland	9	1998
Redland	8	1998
Redland	8	1998
Redland	11	1998
Redland	10	1998
Redland	8	1998
Redland	4	1998
Redland	9	1998
Redland	12	1998
Redland	2	1998
Redland	3	1998
Redland	9	1998
Redland	11	1998
Redland	11	1998
Redland	9	1998
Redland	6	1998
Redland	9	1998
Redland	10	1998
Redland	11	1998
Redland	9	1998
Redland	6	1998
Redland	2	1998
Redland	9	1998
Redland	7	1998
Redland	9	1998
Redland	12	1998
Redland	12	1998
Redland	5	1998
Redland	4	1998
Redland	12	1998
Redland	8	1998
Redland	6	1998
Redland	7	1998
Redland	10	1998
Redland	9	1998
Redland	12	1998
Redland	12	1998
Redland	12	1998
Redland	8	1998
Redland	9	1998
Redland	8	1998
Redland	1	1998
Redland	12	1998
Redland	7	1998
Redland	7	1998
Redland	8	1998
Redland	8	1998
Redland	12	1998
Redland	10	1998
Redland	12	1998
Redland	11	1998
Redland	11	1998
Redland	1	1998
Redland	1	1998
Redland	9	1998
Redland	9	1998
Redland	10	1998
Redland	8	1998
Redland	10	1998
Redland	9	1998
Redland	8	1998
Redland	9	1998
Redland	9	1998
Redland	5	1998
Redland	12	1998
Redland	2	1998
Somerset	12	1998
Redland	3	1998
Somerset	12	1998
Redland	8	1998
Redland	11	1998
Redland	2	1998
Redland	12	1998
Brisbane	12	1998
Brisbane	6	1998
Ipswich	1	1998
Ipswich	5	1998
Ipswich	1	1998
Ipswich	8	1998
Ipswich	7	1998
Ipswich	1	1998
Scenic Rim	11	1998
Scenic Rim	3	1998
Ipswich	7	1998
Brisbane	4	1998
Ipswich	10	1998
Ipswich	10	1998
Ipswich	10	1998
Ipswich	2	1998
Ipswich	12	1998
Brisbane	3	1998
Brisbane	1	1998
Brisbane	4	1998
Brisbane	1	1998
Brisbane	6	1998
Brisbane	1	1998
Brisbane	10	1998
Ipswich	10	1998
Ipswich	10	1998
Ipswich	10	1998
Ipswich	10	1998
Ipswich	1	1998
Brisbane	10	1998
Brisbane	10	1998
Ipswich	5	1998
Ipswich	3	1998
Ipswich	9	1998
Ipswich	1	1998
Ipswich	10	1998
Ipswich	10	1998
Ipswich	10	1998
Ipswich	10	1998
Ipswich	2	1998
Ipswich	10	1998
Ipswich	12	1998
Ipswich	9	1998
Redland	9	1998
Ipswich	11	1998
Ipswich	12	1998
Ipswich	12	1998
Ipswich	12	1998
Logan	9	1998
Logan	9	1998
Logan	1	1998
Logan	10	1998
Logan	1	1998
Moreton Bay	10	1999
Logan	9	1999
Logan	10	1999
Brisbane	6	1999
Logan	9	1999
Logan	8	1999
Logan	11	1999
Logan	2	1999
Logan	2	1999
Logan	11	1999
Logan	11	1999
Logan	1	1999
Logan	9	1999
Logan	9	1999
Logan	10	1999
Logan	8	1999
Logan	3	1999
Logan	2	1999
Logan	12	1999
Logan	8	1999
Logan	8	1999
Logan	12	1999
Logan	9	1999
Logan	1	1999
Logan	6	1999
Logan	8	1999
Logan	9	1999
Logan	12	1999
Logan	12	1999
Logan	12	1999
Logan	11	1999
Logan	8	1999
Logan	11	1999
Logan	11	1999
Logan	12	1999
Logan	11	1999
Logan	11	1999
Logan	11	1999
Logan	9	1999
Logan	3	1999
Logan	12	1999
Logan	11	1999
Logan	10	1999
Logan	11	1999
Logan	3	1999
Logan	4	1999
Logan	6	1999
Logan	7	1999
Logan	7	1999
Logan	6	1999
Logan	9	1999
Logan	8	1999
Moreton Bay	2	1999
Moreton Bay	12	1999
Moreton Bay	12	1999
Moreton Bay	2	1999
Moreton Bay	11	1999
Moreton Bay	2	1999
Moreton Bay	10	1999
Moreton Bay	4	1999
Brisbane	10	1999
Brisbane	10	1999
Moreton Bay	8	1999
Moreton Bay	1	1999
Moreton Bay	4	1999
Brisbane	10	1999
Brisbane	10	1999
Brisbane	5	1999
Brisbane	8	1999
Brisbane	9	1999
Brisbane	10	1999
Brisbane	9	1999
Brisbane	9	1999
Brisbane	1	1999
Brisbane	8	1999
Logan	8	1999
Logan	10	1999
Logan	4	1999
Logan	9	1999
Logan	8	1999
Logan	5	1999
Logan	11	1999
Logan	9	1999
Logan	5	1999
Logan	6	1999
Logan	2	1999
Logan	10	1999
Logan	9	1999
Logan	5	1999
Logan	9	1999
Logan	4	1999
Logan	4	1999
Logan	9	1999
Logan	11	1999
Logan	9	1999
Logan	7	1999
Logan	9	1999
Logan	5	1999
Logan	6	1999
Logan	10	1999
Logan	9	1999
Logan	12	1999
Logan	9	1999
Logan	8	1999
Logan	8	1999
Logan	7	1999
Logan	9	1999
Logan	10	1999
Logan	11	1999
Logan	10	1999
Logan	11	1999
Logan	7	1999
Logan	7	1999
Logan	11	1999
Logan	11	1999
Logan	9	1999
Logan	11	1999
Logan	8	1999
Logan	9	1999
Logan	9	1999
Logan	9	1999
Logan	10	1999
Logan	10	1999
Logan	10	1999
Logan	12	1999
Logan	12	1999
Logan	8	1999
Logan	4	1999
Logan	8	1999
Logan	1	1999
Logan	1	1999
Logan	9	1999
Logan	9	1999
Logan	9	1999
Logan	7	1999
Logan	9	1999
Logan	10	1999
Logan	7	1999
Logan	8	1999
Logan	9	1999
Logan	9	1999
Logan	9	1999
Logan	8	1999
Gold Coast	12	1999
Moreton Bay	9	1999
Moreton Bay	10	1999
Moreton Bay	9	1999
Moreton Bay	12	1999
Moreton Bay	3	1999
Moreton Bay	11	1999
Moreton Bay	1	1999
Moreton Bay	12	1999
Moreton Bay	1	1999
Moreton Bay	4	1999
Moreton Bay	11	1999
Moreton Bay	10	1999
Moreton Bay	3	1999
Moreton Bay	8	1999
Moreton Bay	3	1999
Moreton Bay	11	1999
Moreton Bay	11	1999
Moreton Bay	12	1999
Moreton Bay	3	1999
Moreton Bay	11	1999
Moreton Bay	2	1999
Moreton Bay	6	1999
Moreton Bay	11	1999
Moreton Bay	5	1999
Moreton Bay	12	1999
Moreton Bay	8	1999
Moreton Bay	1	1999
Moreton Bay	4	1999
Moreton Bay	11	1999
Moreton Bay	10	1999
Moreton Bay	9	1999
Brisbane	10	1999
Redland	11	1999
Redland	11	1999
Redland	2	1999
Redland	6	1999
Redland	12	1999
Redland	7	1999
Brisbane	10	1999
Redland	7	1999
Redland	4	1999
Redland	4	1999
Redland	11	1999
Moreton Bay	10	1999
Moreton Bay	10	1999
Brisbane	12	1999
Brisbane	12	1999
Brisbane	9	1999
Redland	10	1999
Redland	4	1999
Redland	3	1999
Redland	8	1999
Redland	8	1999
Redland	4	1999
Redland	11	1999
Redland	2	1999
Redland	10	1999
Redland	5	1999
Redland	9	1999
Redland	11	1999
Redland	2	1999
Redland	4	1999
Redland	8	1999
Redland	9	1999
Redland	9	1999
Redland	9	1999
Redland	9	1999
Redland	1	1999
Redland	10	1999
Redland	9	1999
Redland	11	1999
Redland	10	1999
Redland	11	1999
Redland	9	1999
Redland	11	1999
Redland	1	1999
Redland	6	1999
Redland	1	1999
Redland	8	1999
Redland	8	1999
Redland	8	1999
Redland	2	1999
Redland	7	1999
Redland	1	1999
Redland	11	1999
Redland	12	1999
Redland	9	1999
Redland	1	1999
Redland	11	1999
Redland	11	1999
Redland	11	1999
Redland	9	1999
Redland	11	1999
Redland	11	1999
Redland	5	1999
Logan	9	1999
Redland	8	1999
Redland	10	1999
Redland	10	1999
Redland	4	1999
Redland	8	1999
Redland	8	1999
Logan	5	1999
Moreton Bay	12	1999
Moreton Bay	12	1999
Redland	1	1999
Brisbane	9	1999
Redland	8	1999
Redland	1	1999
Redland	1	1999
Redland	11	1999
Redland	8	1999
Redland	11	1999
Redland	11	1999
Redland	10	1999
Redland	9	1999
Redland	6	1999
Redland	5	1999
Redland	5	1999
Redland	5	1999
Redland	12	1999
Redland	3	1999
Redland	5	1999
Redland	8	1999
Redland	10	1999
Redland	4	1999
Redland	9	1999
Redland	3	1999
Redland	8	1999
Redland	8	1999
Redland	12	1999
Redland	8	1999
Redland	9	1999
Redland	10	1999
Redland	10	1999
Redland	6	1999
Brisbane	9	1999
Brisbane	8	1999
Redland	5	1999
Redland	8	1999
Redland	10	1999
Redland	9	1999
Redland	9	1999
Redland	10	1999
Redland	10	1999
Redland	5	1999
Brisbane	10	1999
Redland	11	1999
Redland	4	1999
Redland	9	1999
Redland	9	1999
Redland	2	1999
Redland	12	1999
Redland	11	1999
Redland	11	1999
Redland	11	1999
Redland	9	1999
Redland	10	1999
Redland	5	1999
Redland	10	1999
Redland	10	1999
Redland	10	1999
Redland	10	1999
Brisbane	10	1999
Redland	12	1999
Redland	9	1999
Redland	3	1999
Redland	7	1999
Redland	8	1999
Brisbane	9	1999
Redland	11	1999
Redland	12	1999
Brisbane	6	1999
Redland	8	1999
Redland	8	1999
Redland	9	1999
Redland	12	1999
Redland	7	1999
Redland	6	1999
Redland	10	1999
Redland	8	1999
Redland	8	1999
Redland	7	1999
Redland	5	1999
Redland	11	1999
Redland	5	1999
Redland	9	1999
Redland	4	1999
Redland	9	1999
Redland	10	1999
Redland	8	1999
Redland	10	1999
Redland	2	1999
Redland	1	1999
Redland	10	1999
Redland	10	1999
Redland	10	1999
Redland	9	1999
Redland	4	1999
Redland	10	1999
Redland	5	1999
Redland	10	1999
Redland	10	1999
Redland	5	1999
Redland	8	1999
Redland	11	1999
Redland	9	1999
Redland	5	1999
Redland	11	1999
Redland	10	1999
Redland	9	1999
Redland	9	1999
Redland	12	1999
Redland	9	1999
Redland	9	1999
Redland	9	1999
Redland	10	1999
Redland	12	1999
Redland	12	1999
Redland	12	1999
Redland	11	1999
Redland	11	1999
Redland	9	1999
Redland	1	1999
Redland	9	1999
Redland	7	1999
Redland	4	1999
Redland	4	1999
Redland	3	1999
Redland	11	1999
Redland	5	1999
Redland	11	1999
Redland	9	1999
Redland	9	1999
Redland	11	1999
Redland	11	1999
Redland	9	1999
Redland	5	1999
Redland	11	1999
Redland	10	1999
Redland	8	1999
Redland	10	1999
Redland	9	1999
Redland	10	1999
Redland	6	1999
Redland	8	1999
Redland	9	1999
Redland	6	1999
Redland	9	1999
Redland	9	1999
Redland	9	1999
Redland	10	1999
Redland	11	1999
Redland	10	1999
Redland	3	1999
Redland	2	1999
Redland	11	1999
Redland	11	1999
Redland	9	1999
Redland	6	1999
Redland	8	1999
Redland	8	1999
Redland	9	1999
Redland	8	1999
Redland	8	1999
Redland	5	1999
Redland	2	1999
Redland	10	1999
Redland	2	1999
Redland	5	1999
Redland	6	1999
Redland	9	1999
Redland	7	1999
Redland	8	1999
Redland	12	1999
Redland	10	1999
Redland	8	1999
Redland	8	1999
Redland	8	1999
Redland	11	1999
Redland	8	1999
Redland	3	1999
Redland	9	1999
Redland	2	1999
Redland	8	1999
Redland	3	1999
Redland	3	1999
Redland	11	1999
Redland	2	1999
Redland	2	1999
Redland	2	1999
Redland	1	1999
Redland	10	1999
Redland	10	1999
Redland	10	1999
Redland	10	1999
Redland	3	1999
Redland	12	1999
Redland	3	1999
Redland	8	1999
Redland	7	1999
Redland	12	1999
Redland	12	1999
Redland	8	1999
Redland	1	1999
Redland	5	1999
Redland	8	1999
Redland	10	1999
Moreton Bay	8	1999
Somerset	2	1999
Somerset	6	1999
Lockyer Valley	1	1999
Redland	9	1999
Redland	12	1999
Redland	12	1999
Brisbane	5	1999
Redland	8	1999
Redland	7	1999
Redland	7	1999
Redland	1	1999
Brisbane	1	1999
Ipswich	6	1999
Ipswich	12	1999
Logan	10	1999
Ipswich	9	1999
Ipswich	3	1999
Ipswich	9	1999
Redland	5	1999
Redland	10	1999
Ipswich	7	1999
Ipswich	8	1999
Ipswich	8	1999
Ipswich	6	1999
Ipswich	4	1999
Ipswich	6	1999
Ipswich	4	1999
Ipswich	8	1999
Logan	11	1999
Logan	3	1999
Brisbane	8	2000
Moreton Bay	8	2000
Moreton Bay	1	2000
Moreton Bay	10	2000
Logan	9	2000
Logan	9	2000
Logan	9	2000
Logan	10	2000
Logan	9	2000
Logan	12	2000
Logan	10	2000
Logan	9	2000
Logan	10	2000
Logan	9	2000
Logan	10	2000
Logan	11	2000
Logan	10	2000
Logan	9	2000
Logan	8	2000
Logan	10	2000
Logan	7	2000
Logan	9	2000
Logan	10	2000
Logan	11	2000
Logan	9	2000
Logan	11	2000
Logan	5	2000
Logan	5	2000
Logan	9	2000
Logan	7	2000
Logan	10	2000
Logan	9	2000
Logan	10	2000
Logan	8	2000
Logan	8	2000
Logan	9	2000
Logan	11	2000
Logan	4	2000
Logan	4	2000
Logan	11	2000
Logan	6	2000
Logan	9	2000
Logan	9	2000
Logan	3	2000
Logan	5	2000
Logan	10	2000
Logan	10	2000
Logan	6	2000
Logan	7	2000
Logan	10	2000
Logan	2	2000
Logan	7	2000
Logan	10	2000
Logan	9	2000
Logan	10	2000
Logan	9	2000
Logan	10	2000
Logan	11	2000
Logan	11	2000
Logan	11	2000
Logan	5	2000
Logan	11	2000
Logan	10	2000
Logan	10	2000
Logan	10	2000
Logan	6	2000
Logan	8	2000
Logan	10	2000
Logan	12	2000
Logan	8	2000
Logan	12	2000
Logan	10	2000
Logan	12	2000
Logan	9	2000
Logan	9	2000
Logan	10	2000
Logan	12	2000
Logan	12	2000
Logan	12	2000
Logan	8	2000
Logan	12	2000
Logan	10	2000
Logan	8	2000
Logan	8	2000
Logan	6	2000
Logan	11	2000
Logan	9	2000
Logan	10	2000
Logan	11	2000
Logan	10	2000
Gold Coast	8	2000
Logan	10	2000
Moreton Bay	10	2000
Moreton Bay	7	2000
Moreton Bay	6	2000
Moreton Bay	8	2000
Moreton Bay	5	2000
Moreton Bay	2	2000
Moreton Bay	10	2000
Moreton Bay	10	2000
Moreton Bay	6	2000
Moreton Bay	2	2000
Moreton Bay	7	2000
Moreton Bay	3	2000
Moreton Bay	11	2000
Moreton Bay	5	2000
Moreton Bay	7	2000
Brisbane	8	2000
Brisbane	8	2000
Brisbane	8	2000
Brisbane	5	2000
Brisbane	7	2000
Brisbane	9	2000
Brisbane	9	2000
Brisbane	9	2000
Moreton Bay	8	2000
Moreton Bay	8	2000
Moreton Bay	7	2000
Moreton Bay	8	2000
Moreton Bay	9	2000
Moreton Bay	5	2000
Moreton Bay	7	2000
Moreton Bay	6	2000
Moreton Bay	4	2000
Moreton Bay	9	2000
Moreton Bay	4	2000
Moreton Bay	11	2000
Moreton Bay	10	2000
Moreton Bay	10	2000
Brisbane	8	2000
Brisbane	9	2000
Brisbane	9	2000
Brisbane	5	2000
Brisbane	9	2000
Brisbane	11	2000
Brisbane	4	2000
Brisbane	10	2000
Brisbane	10	2000
Brisbane	9	2000
Brisbane	9	2000
Brisbane	9	2000
Logan	6	2000
Brisbane	11	2000
Logan	2	2000
Logan	9	2000
Logan	10	2000
Logan	7	2000
Brisbane	2	2000
Logan	9	2000
Logan	8	2000
Logan	8	2000
Logan	7	2000
Logan	8	2000
Brisbane	9	2000
Logan	10	2000
Logan	5	2000
Logan	9	2000
Logan	11	2000
Logan	11	2000
Logan	10	2000
Logan	10	2000
Logan	8	2000
Logan	8	2000
Logan	9	2000
Brisbane	7	2000
Brisbane	8	2000
Logan	7	2000
Logan	11	2000
Logan	9	2000
Logan	5	2000
Logan	8	2000
Brisbane	7	2000
Logan	11	2000
Logan	12	2000
Logan	12	2000
Logan	8	2000
Logan	9	2000
Logan	8	2000
Logan	7	2000
Logan	7	2000
Logan	9	2000
Logan	10	2000
Logan	9	2000
Logan	8	2000
Logan	8	2000
Logan	8	2000
Logan	8	2000
Logan	8	2000
Logan	8	2000
Logan	3	2000
Logan	9	2000
Logan	7	2000
Logan	5	2000
Logan	9	2000
Logan	10	2000
Logan	10	2000
Logan	10	2000
Logan	6	2000
Logan	8	2000
Logan	10	2000
Logan	12	2000
Logan	8	2000
Logan	8	2000
Logan	7	2000
Logan	10	2000
Logan	8	2000
Logan	9	2000
Logan	9	2000
Logan	10	2000
Logan	11	2000
Logan	11	2000
Logan	12	2000
Logan	8	2000
Logan	9	2000
Logan	9	2000
Logan	1	2000
Logan	8	2000
Logan	8	2000
Logan	8	2000
Logan	9	2000
Logan	7	2000
Logan	8	2000
Logan	9	2000
Logan	8	2000
Logan	11	2000
Logan	5	2000
Logan	2	2000
Logan	10	2000
Logan	7	2000
Logan	10	2000
Logan	1	2000
Logan	9	2000
Logan	4	2000
Logan	6	2000
Logan	10	2000
Logan	9	2000
Logan	3	2000
Logan	10	2000
Logan	9	2000
Logan	9	2000
Logan	9	2000
Logan	12	2000
Logan	11	2000
Logan	9	2000
Logan	9	2000
Logan	11	2000
Logan	10	2000
Logan	12	2000
Logan	4	2000
Logan	9	2000
Logan	9	2000
Logan	9	2000
Logan	10	2000
Logan	10	2000
Logan	5	2000
Logan	10	2000
Logan	4	2000
Logan	7	2000
Logan	3	2000
Logan	10	2000
Logan	9	2000
Logan	12	2000
Logan	8	2000
Logan	10	2000
Logan	10	2000
Logan	10	2000
Logan	9	2000
Logan	12	2000
Logan	11	2000
Logan	10	2000
Logan	9	2000
Logan	10	2000
Logan	6	2000
Logan	8	2000
Logan	11	2000
Logan	7	2000
Logan	7	2000
Logan	9	2000
Logan	11	2000
Logan	9	2000
Logan	1	2000
Logan	4	2000
Logan	6	2000
Logan	3	2000
Moreton Bay	6	2000
Moreton Bay	3	2000
Moreton Bay	4	2000
Moreton Bay	10	2000
Moreton Bay	10	2000
Moreton Bay	10	2000
Moreton Bay	10	2000
Moreton Bay	10	2000
Moreton Bay	10	2000
Moreton Bay	8	2000
Moreton Bay	8	2000
Moreton Bay	6	2000
Moreton Bay	8	2000
Moreton Bay	8	2000
Moreton Bay	9	2000
Moreton Bay	6	2000
Moreton Bay	6	2000
Moreton Bay	7	2000
Moreton Bay	11	2000
Moreton Bay	10	2000
Moreton Bay	10	2000
Moreton Bay	10	2000
Moreton Bay	10	2000
Moreton Bay	4	2000
Moreton Bay	8	2000
Moreton Bay	6	2000
Moreton Bay	2	2000
Moreton Bay	6	2000
Moreton Bay	10	2000
Moreton Bay	8	2000
Moreton Bay	11	2000
Moreton Bay	5	2000
Moreton Bay	8	2000
Moreton Bay	3	2000
Moreton Bay	3	2000
Moreton Bay	8	2000
Moreton Bay	10	2000
Moreton Bay	8	2000
Moreton Bay	10	2000
Moreton Bay	10	2000
Moreton Bay	9	2000
Moreton Bay	7	2000
Moreton Bay	3	2000
Moreton Bay	2	2000
Moreton Bay	9	2000
Moreton Bay	9	2000
Moreton Bay	10	2000
Moreton Bay	10	2000
Moreton Bay	8	2000
Moreton Bay	9	2000
Moreton Bay	12	2000
Moreton Bay	12	2000
Moreton Bay	12	2000
Moreton Bay	7	2000
Moreton Bay	5	2000
Moreton Bay	8	2000
Moreton Bay	9	2000
Moreton Bay	7	2000
Moreton Bay	6	2000
Moreton Bay	11	2000
Moreton Bay	6	2000
Moreton Bay	9	2000
Moreton Bay	7	2000
Moreton Bay	11	2000
Moreton Bay	5	2000
Moreton Bay	12	2000
Moreton Bay	11	2000
Moreton Bay	7	2000
Moreton Bay	3	2000
Moreton Bay	8	2000
Moreton Bay	8	2000
Moreton Bay	1	2000
Moreton Bay	6	2000
Moreton Bay	8	2000
Moreton Bay	7	2000
Moreton Bay	9	2000
Moreton Bay	11	2000
Moreton Bay	7	2000
Moreton Bay	5	2000
Moreton Bay	7	2000
Moreton Bay	4	2000
Moreton Bay	9	2000
Moreton Bay	10	2000
Moreton Bay	6	2000
Moreton Bay	10	2000
Moreton Bay	12	2000
Moreton Bay	12	2000
Moreton Bay	9	2000
Moreton Bay	9	2000
Moreton Bay	9	2000
Moreton Bay	12	2000
Moreton Bay	9	2000
Moreton Bay	7	2000
Moreton Bay	9	2000
Moreton Bay	10	2000
Moreton Bay	9	2000
Moreton Bay	6	2000
Moreton Bay	9	2000
Brisbane	6	2000
Brisbane	11	2000
Brisbane	10	2000
Brisbane	8	2000
Brisbane	5	2000
Brisbane	10	2000
Brisbane	8	2000
Moreton Bay	3	2000
Moreton Bay	3	2000
Redland	10	2000
Moreton Bay	11	2000
Redland	9	2000
Redland	10	2000
Moreton Bay	9	2000
Moreton Bay	7	2000
Moreton Bay	11	2000
Moreton Bay	2	2000
Moreton Bay	11	2000
Moreton Bay	8	2000
Moreton Bay	10	2000
Moreton Bay	10	2000
Moreton Bay	5	2000
Moreton Bay	5	2000
Moreton Bay	10	2000
Moreton Bay	11	2000
Brisbane	9	2000
Brisbane	8	2000
Brisbane	10	2000
Brisbane	9	2000
Brisbane	9	2000
Redland	5	2000
Redland	10	2000
Redland	5	2000
Redland	9	2000
Redland	4	2000
Redland	1	2000
Redland	10	2000
[truncated: 12,077 more rows]
